# Supplementary material
Source: ML conference proceedings conference paper supplement (https://openaccess.thecvf.com/content/ICCV2023/html/Cai_CLNeRF_Continual_Learning_ICCV_2023_paper.html)
Supplement: Supplementary file 1 [file Cai_CLNeRF_Continual_Learning_ICCV_2023_supplemental.pdf]

## A. Further Implementation Details for Different Methods

**EWC.** EWC [12] regularizes the current model  $\theta_t$  to be close to  $\theta_{t-1}$ . The training loss of EWC at time step  $t$  is

$$\mathcal{L}_{\text{EWC}}(\theta_t) = \mathcal{L}_{\text{NeRF}}(\theta_t) + \sum_i \frac{\lambda}{2} F_i(\theta_{t,i} - \theta_{t-1,i})^2, \quad (4)$$

where  $\mathcal{L}_{\text{NeRF}}(\cdot)$  is the original NeRF training loss,  $F_i$  is the  $i$ -th element of the diagonal of the Fisher information matrix,  $\theta_{t,i}$  is the  $i$ -th element of  $\theta_t$ , and  $\lambda$  is the hyper-parameter that controls the regularization strength. As in the original paper, the regularization term from EWC has a much smaller magnitude than  $\mathcal{L}_{\text{NeRF}}$ . To make regularization effective, we tune  $\lambda$  by grid search from  $1e3$  to  $1e9$  on the Synth-NeRF dataset, and picking  $1e5$  that provides the best performance (making the regularization term roughly 10% of  $\mathcal{L}_{\text{NeRF}}$ ).

**ER.** Experience replay (ER) [5] uses the loss on both new and historical data to update the model  $\theta_t$ . Due to the ineffectiveness of biased sampling for continual NeRF, we use random sampling for ER to produce the best performance and uniformly weight the losses of all ray samples.

**MEIL-NeRF.** MEIL-NeRF [6] forms each mini-batch of training data by sampling  $\frac{2}{3}$  of the rays from new data, and the rest from old ones. The training loss of MEIL-NeRF is

$$\frac{1}{|\mathbf{X}_c|} \sum_{\mathbf{X}_c} \mathcal{L}_{\text{NeRF}}(\mathbf{X}_c, \theta_t) + \frac{\lambda_{\text{MEIL}}}{|\mathbf{X}_o|} \sum_{\mathbf{X}_o} \rho(\hat{C}(\mathbf{X}_o|\theta_{t-1}) - \hat{C}(\mathbf{X}_o|\theta_t)), \quad (5)$$

where  $\mathbf{X}_c$  and  $\mathbf{X}_o$  are respectively the rays from new and old data,  $\mathcal{L}_{\text{NeRF}}(\cdot)$  is the original loss for NeRF training,  $\rho(\cdot)$  is the Charbonnier penalty function,  $\hat{C}(\mathbf{X}|\theta)$  is the color of ray  $\mathbf{X}$  generated by  $\theta$ , and  $\lambda_{\text{MEIL}}$  is the hyper-parameter that controls the regularization strength from old data. Following S2 of the original paper,  $\lambda_{\text{MEIL}}$  is scheduled as

$$\lambda_{\text{MEIL}} = \frac{\cos(\pi(1+r)) + 1}{2}, \quad (6)$$

where  $r$  is the training progress rate (from 0 to 1) in each time step. Note that we correct the typo of the original paper and add a “+1” after  $\cos(\cdot)$  to ensure that  $\lambda$  grows gradually from 0 to 1 (consistent with Figure S5 of the original paper).

**CLNeRF** Depending on the resource limit, the generative replay of CLNeRF can be implemented in both online and offline fashion. For applications where new data are generated only once a while (e.g., city scans are uploaded once a couple of days), the model is mostly in the deploy mode. Hence during the infrequent case of model update, we can assign a temporal storage to store all images generated by  $\theta_{t-1}$ , and then use them to update  $\theta_t$ . The benefit of this implementation is that we only need to load 1 model into the GPU memory, and the temporal storage can be released once we finish updating  $\theta_t$  (which takes only 5-20 mins for CLNeRF). For applications where no temporal storage can be used, we load  $\theta_{t-1}$  (evaluation mode to same memory) and  $\theta_t$  into the GPU at the same time, and generate the replay supervision signal on-the-fly, which requires an extra forward pass per training iteration. In our test, such implementation can still fit into a single RTX6000 GPU, and increased the training time by roughly 60%, which is still fast for NGP. We use the first implementation in our experiments due to its simplicity.

## B. Further Qualitative Results on WAT

Here, we show further qualitative results on individual scenes of WAT. To better demonstrate the advantage of CLNeRF in terms of architecture design and continual learning strategies, we show the results of other continual NeRF methods with (Fig. 8) and without (Fig. 7) using the proposed trainable embeddings (please refer to the video demo in our github repo for close-view comparisons). Methods without trainable embeddings cannot recover the geometry and appearance of past time steps, resulting in severe artifacts. Even with trainable embeddings, severe artifacts (NT, EWC) and detail lost (ER, MEIL-NeRF) still exist in other baselines.

## C. Quantitative Results on Individual Scenes

This section shows the quantitative results (Tab. 6 to 10) on individual scenes of each used dataset. CLNeRF performs better than other continual NeRF approaches on *all* individual scenes, even without storing any historical image. The performance gap between CLNeRF and UB is also small for all scenes. Due to the training noise and the close practical performance, the best model of each scene changes between CLNeRF and CLNeRF-noER and UB.

## D. Baseline Results with NGP

In the main experiments (Tab. 1), we choose the best architecture for different baselines and observe that methods like ER and NT perform better with vanilla NeRF. Here, we further report the baseline results using NGP architecture. Due to the NaN loss issue of NGP, we cannot perform EWC on it. Hence, we only report the results for NT and ER. Due to the resource limit, we only report the results on Synth-NeRF, NeRF++ and WAT. As discussed in Sec. 5.2.3, NGP without generative replay overfits to the training views and fails to generalize to novel views and past time steps.

## E. More WAT Scenes

In this section, we add 4 more scenes to WAT, making the total number of scenes from 6 to 10. We use the same data creation process as described in Sec. 4 and call this enlarged dataset WAT+ (available in our code repository). As shown in Tab. 12 the results on these new scenes are consistent with Tab. 1.

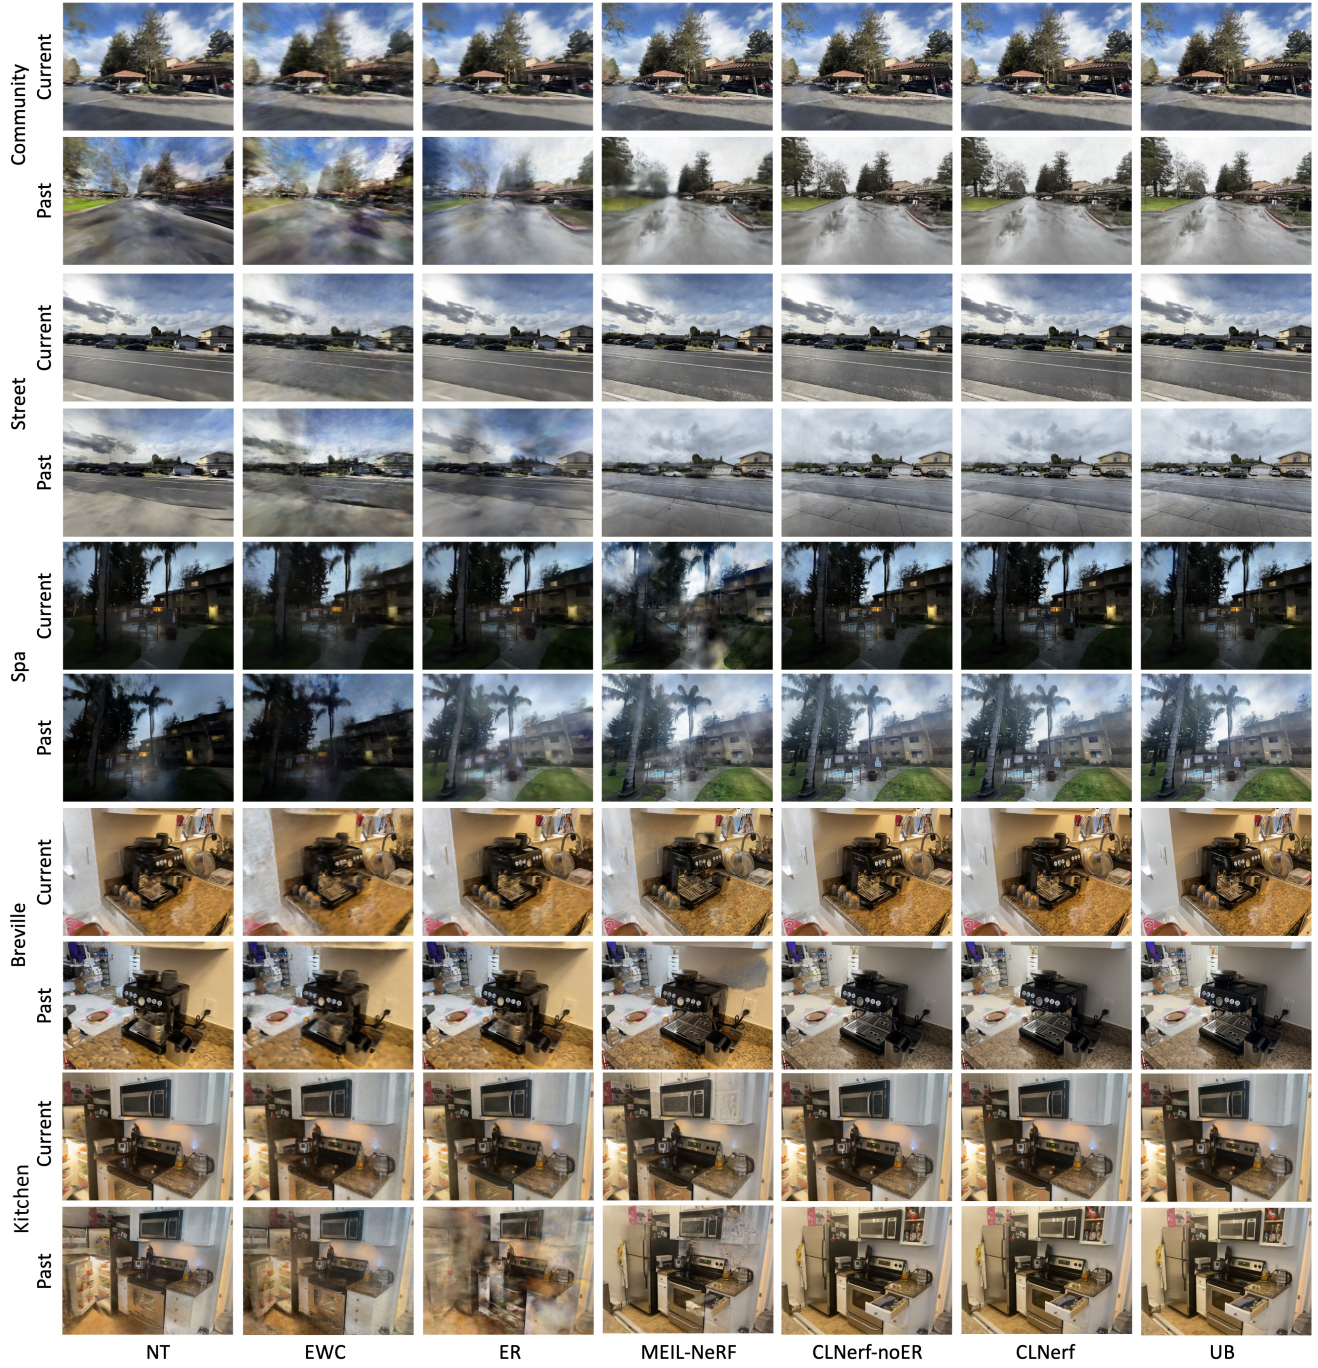

Figure 7. **Further qualitative results without using trainable embeddings for other continual NeRF baselines (zoom-in recommended).** Methods without trainable embeddings cannot properly recover the appearance and geometry of the scene at past time steps.

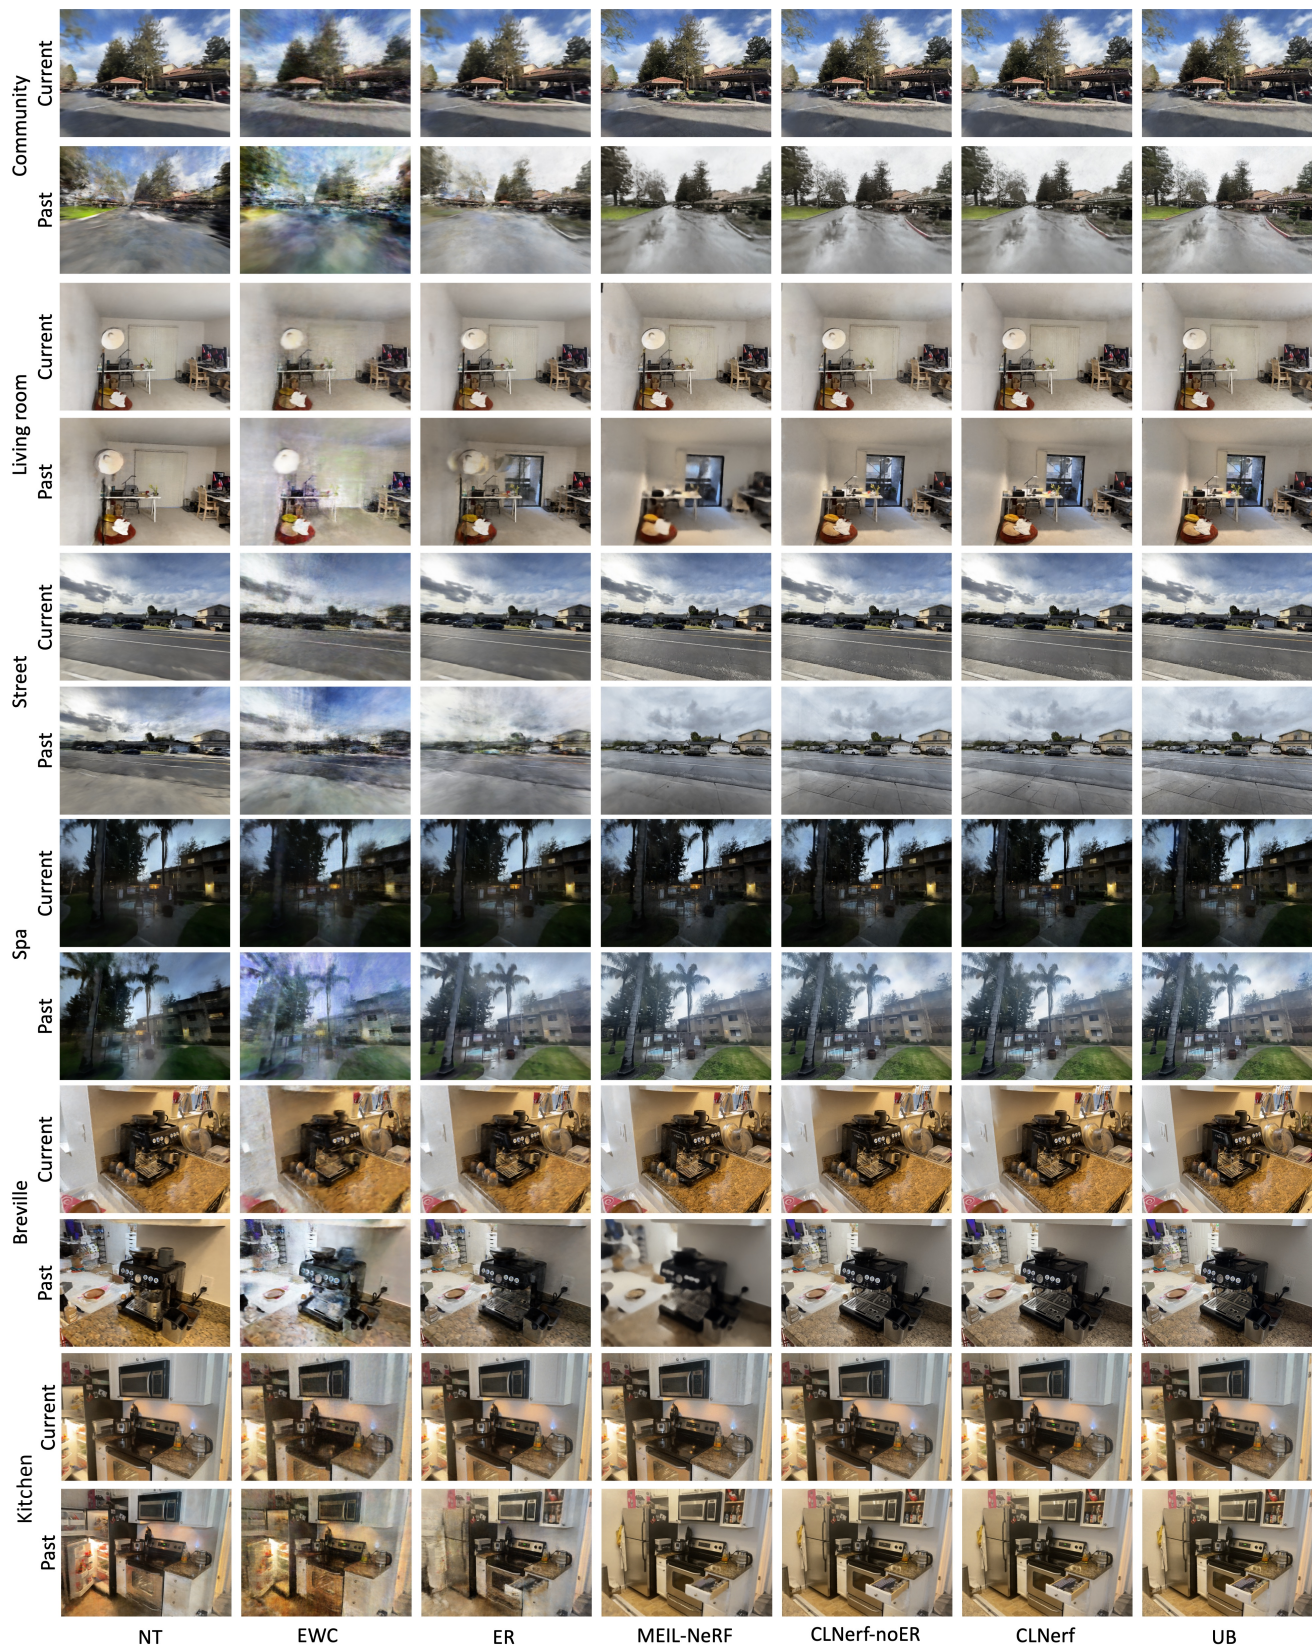

Figure 8. **Further qualitative results with trainable embeddings used in all methods (zoom-in recommended).** Each two rows show for different methods the rendered views on test data from current and previous steps. Similar performance difference can be observed as in the main experiments.

| Method \ Scene          | Breville           | Kitchen            | Living room        | Community          | Spa                | Street             |
|-------------------------|--------------------|--------------------|--------------------|--------------------|--------------------|--------------------|
| NT (NeRF) noEmbed       | 19.53/0.676        | 18.30/0.771        | 17.27/0.788        | 13.58/0.533        | 12.97/0.489        | 15.36/0.490        |
| NT (NeRF)               | 19.95/0.695        | 18.69/0.771        | 17.65/0.790        | 13.97/0.538        | 14.71/0.612        | 15.24/0.486        |
| EWC (NeRF) noEmbed      | 19.07/0.653        | 17.70/0.753        | 17.36/0.782        | 13.40/0.530        | 12.57/0.501        | 14.76/0.473        |
| EWC (NeRF)              | 19.15/0.657        | 17.89/0.745        | 17.47/0.780        | 14.12/0.543        | 17.04/0.701        | 15.14/0.475        |
| ER (NeRF) noEmbed       | 19.07/0.673        | 20.12/0.793        | 17.84/0.793        | 16.68/0.589        | 16.77/0.634        | 16.87/0.512        |
| ER (NeRF)               | 23.46/0.717        | 25.03/0.836        | 21.41/0.813        | 17.65/0.600        | 21.92/0.752        | 18.71/0.538        |
| MEIL-NeRF (NGP) noEmbed | 22.12/0.781        | 22.08/0.822        | 18.11/0.785        | 21.91/0.612        | 20.67/0.741        | 20.64/0.581        |
| MEIL-NeRF (NGP)         | 23.55/0.710        | 27.27/0.861        | 23.56/0.821        | 21.92/0.609        | 25.60/0.771        | 22.39/0.608        |
| CLNeRF-noER (NGP)       | 27.61/0.808        | <b>28.59/0.880</b> | 24.56/0.829        | 22.80/0.628        | <b>26.56/0.812</b> | <b>22.53/0.615</b> |
| CLNeRF (NGP)            | <b>28.02/0.826</b> | 28.40/0.877        | <b>24.58/0.829</b> | <b>22.88/0.629</b> | 26.28/0.811        | 22.53/0.612        |
| UB (NGP)                | 28.62/0.838        | 28.53/0.878        | 24.51/0.826        | 23.65/0.634        | 26.92/0.812        | 22.87/0.615        |

Table 6. Results on individual scenes of WAT.

| Method \ Scene    | Lego               | Chair              | Drums              | Ficus              | Hotdog             | Materials          | Mic                | Ship               |
|-------------------|--------------------|--------------------|--------------------|--------------------|--------------------|--------------------|--------------------|--------------------|
| NT (NeRF)         | 30.70/0.956        | 31.02/0.965        | 21.96/0.897        | 27.47/0.957        | 32.64/0.969        | 26.63/0.932        | 29.68/0.972        | 28.17/0.855        |
| EWC (NeRF)        | 30.82/0.952        | 30.57/0.950        | 22.58/0.895        | 26.41/0.946        | 32.55/0.967        | 26.39/0.918        | 30.73/0.970        | 26.55/0.823        |
| ER (NeRF)         | 33.21/0.969        | 32.76/0.973        | 23.25/0.915        | 29.56/0.968        | 34.22/0.973        | 27.50/0.939        | 32.79/0.984        | 29.06/0.866        |
| MEIL-NeRF (NGP)   | 32.91/0.971        | 32.75/0.979        | 24.35/0.928        | 30.96/0.977        | 34.87/0.977        | 28.16/0.941        | 32.93/0.986        | 28.52/0.866        |
| CLNeRF-noER (NGP) | 34.34/0.975        | 34.29/0.982        | <b>25.51/0.931</b> | 32.91/0.979        | 36.20/0.979        | 28.92/0.941        | 34.38/0.987        | 29.15/0.878        |
| CLNeRF (NGP)      | <b>34.80/0.976</b> | <b>34.39/0.980</b> | 25.46/0.931        | <b>33.10/0.980</b> | <b>36.42/0.979</b> | <b>29.12/0.943</b> | <b>34.68/0.987</b> | <b>29.30/0.880</b> |
| UB (NGP)          | 35.70/0.978        | 35.41/0.982        | 25.74/0.932        | 33.96/0.982        | 37.24/0.980        | 29.43/0.944        | 35.83/0.989        | 30.19/0.888        |

Table 7. Results on individual scenes of SynthNeRF.

| Method \ Scene    | Ignatius           | Truck              | Barn               | Caterpillar        | Family             |
|-------------------|--------------------|--------------------|--------------------|--------------------|--------------------|
| NT (NeRF)         | 24.51/0.924        | 16.76/0.739        | 15.98/0.614        | 13.64/0.701        | 22.03/0.863        |
| EWC (NeRF)        | 24.83/0.925        | 16.28/0.730        | 12.46/0.619        | 14.34/0.898        | 22.68/0.880        |
| ER (NeRF)         | 26.79/0.948        | 24.26/0.883        | 26.02/0.836        | 24.75/0.898        | 30.71/0.944        |
| MEIL-NeRF (NGP)   | 29.56/0.954        | 25.85/0.903        | 22.99/0.825        | 26.33/0.916        | 31.24/0.949        |
| CLNeRF-noER (NGP) | 30.22/0.956        | 27.55/0.920        | <b>27.55/0.851</b> | 28.12/0.930        | 33.34/0.961        |
| CLNeRF (NGP)      | <b>30.41/0.957</b> | <b>27.59/0.918</b> | 27.47/0.848        | <b>28.29/0.933</b> | <b>33.68/0.961</b> |
| UB (NGP)          | 30.94/0.960        | 28.11/0.926        | 28.45/0.866        | 29.08/0.940        | 34.91/0.964        |

Table 8. Results on individual scenes of NSVF.

| Method \ Scene    | M60                | Playground         | Train              | Truck              |
|-------------------|--------------------|--------------------|--------------------|--------------------|
| NT (NeRF)         | 15.87/0.569        | 15.70/0.444        | 12.73/0.365        | 14.91/0.468        |
| EWC (NeRF)        | 13.89/0.465        | 16.28/0.462        | 13.38/0.366        | 16.56/0.478        |
| ER (NeRF)         | 16.10/0.580        | 19.67/0.569        | 16.18/0.476        | 17.46/0.544        |
| MEIL-NeRF (NGP)   | 18.11/0.621        | 21.53/0.592        | 17.16/0.533        | 20.76/0.635        |
| CLNeRF-noER (NGP) | 18.88/0.631        | 22.18/0.643        | 17.20/0.561        | <b>22.99/0.694</b> |
| CLNeRF (NGP)      | <b>19.04/0.634</b> | <b>22.37/0.643</b> | <b>17.31/0.563</b> | <b>22.61/0.695</b> |
| UB (NGP)          | 18.69/0.623        | 22.31/0.672        | 17.36/0.586        | 22.99/0.712        |

Table 9. Results on individual scenes of NeRF++.

| Method \ Scene    | Brandenburg Gate    | Sacre Coeur        | Trevi Fountain     | Taj Mahal           |
|-------------------|---------------------|--------------------|--------------------|---------------------|
| NT (NGP)          | 21.11/0.793         | 15.78/0.642        | 19.43/0.613        | 19.82/0.722         |
| ER (NGP)          | 24.20/0.803         | 16.91/0.682        | 19.57/0.616        | 19.85/0.723         |
| MEIL-NeRF (NGP)   | 24.22/0.802         | 20.53/0.744        | 21.42/0.667        | 23.21/0.770         |
| CLNerf-noER (NGP) | 25.24/ <b>0.803</b> | 20.62/0.753        | <b>21.53/0.668</b> | 23.32/ <b>0.781</b> |
| CLNerf (NGP)      | <b>25.43/0.802</b>  | <b>21.32/0.765</b> | 21.44/0.667        | <b>23.34/0.780</b>  |
| UB (NeRFW)        | 24.23/0.881         | 21.59/0.833        | 21.99/0.853        | 23.32/0.726         |
| UB (NGP)          | 25.58/0.813         | 21.22/0.785        | 21.64/0.676        | 23.76/0.780         |

Table 10. **Results on individual scenes of Phototourism.**

| Dataset  | Synth-NeRF  | NeRF++      | WAT         |
|----------|-------------|-------------|-------------|
| NT (NGP) | 21.66/0.858 | 11.93/0.380 | 11.51/0.356 |
| ER (NGP) | 27.35/0.919 | 15.13/0.436 | 19.03/0.657 |

Table 11. **Baseline results on NGP architecture.** Comparing with Tab. [1](#) we can see that for baselines like NT and ER, NGP performs much worse than vanilla NeRF. See Sec. [5.2.3](#) for analysis on architectures.

| Method \ Scene    | Car                | Grill              | Mac                | Ninja              |
|-------------------|--------------------|--------------------|--------------------|--------------------|
| NT (NeRF)         | 19.14/0.516        | 19.96/0.612        | 18.68/0.831        | 19.92/0.814        |
| EWC (NeRF)        | 18.46/0.500        | 19.67/0.602        | 18.48/0.816        | 19.74/0.805        |
| ER (NeRF)         | 19.10/0.510        | 21.03/0.618        | 23.07/0.871        | 21.49/0.827        |
| MEIL-NeRF (NGP)   | 21.80/0.528        | 24.01/0.648        | 12.71/0.687        | 13.22/0.668        |
| CLNeRF-noER (NGP) | 22.63/0.539        | 24.81/0.652        | <b>29.34/0.907</b> | 26.42/0.869        |
| CLNeRF (NGP)      | <b>22.73/0.541</b> | <b>24.84/0.653</b> | 29.33/0.906        | <b>27.19/0.878</b> |
| UB (NGP)          | 22.62/0.538        | 25.12/0.661        | 30.16/0.905        | 26.71/0.875        |

Table 12. **Results on the 4 scenes added to WAT+.**
